# Supplementary material for: Introduction of Vaccinomics to Develop Personalized Vaccines in Light of Changes in the Usage of Hantaan Virus Vaccine (Hantavax®) in Korea
Source: PubMed Central journal article supplement — J Prev Med Public Health. 2019 Aug 7;52(5):277–80. doi: 10.3961/jpmph.19.018 (PMC6780290; doi:10.3961/jpmph.19.018), 2019-08-07
Supplement: jpmph-52-5-277-suppl.pdf [file jpmph-52-5-277-suppl.pdf]

## Introduction of Vaccinomics to Develop Personalized Vaccines in Light of Changes in the Usage of Hantaan Virus Vaccine (Hantavax<sup>®</sup>) in Korea

Jong-Myon Bae

Department of Preventive Medicine, Jeju National University School of Medicine, Jeju, Korea

### 한타박스주의 용법 변경에 있어 맞춤형 백신 개발을 위한 백신체학 적용

배종면

국립제주대학교 의학전문대학원 예방의학교실

The Ministry of Food and Drug Safety of Korea made an official announcement in March 2018 that the total number of inoculations of Hantaan virus vaccine (Hantavax<sup>®</sup>) would change from 3 to 4. Some aspects of this decision remain controversial. Based on the characteristics of Hantaan virus (HTNV) and its role in the pathogenesis of hemorrhagic fever with renal syndrome, it might be difficult to develop an effective and safe HTNV vaccine through the isolate-inactivate-inject paradigm. With the development of high-throughput 'omics' technologies in the 21st century, vaccinomics has been introduced. While the goal of vaccinomics is to develop equations to describe and predict the immune response, it could also serve as a tool for developing new vaccine candidates and individualized approaches to vaccinology. Thus, the possibility of applying the innovative field of vaccinomics to develop a more effective and safer HTNV vaccine should be considered.

**Key words:** Hantaan virus, Hemorrhagic fever with renal syndrome, Synthetic vaccines, Immunogenetics, Precision medicine

### 2018년도 한타박스주 용법 변경에 대한 문제제기

2018년 3월 21일 식품의약품안전처(식약처)의 중앙약사심의위원회는 신증후출혈열(Hemorrhagic fever with renal syndrome, HFRS)의 예방을 위해 개발된 한타박스주(Hantavax<sup>®</sup>)

의 용법에 있어 기존의 접종횟수를 총 3회에서 4회로 변경하기로 의결하였다[1]. 또한 장기 면역원성 결과에 있어 타당하다고 결론지으면서, 1990년 7월 식약처가 사용 허가를 조건부 승인할 때의 '유효성 임상 및 장기 면역성 측정'에 대한 조건을 모두 삭제한 것으로 해석된다. 이상의 의결 도출과정에서 위원들 간의 논의 내용이 회의록으로 공개되었는데, 다음의 3가지 주요 논점들을 검토해 본다.

첫째, 회의록 전체 맥락상 면역원성(immunogenicity) 판단을 중화항체(neutralizing antibody) 1:10 양전률에 근거하였다고 추론된다. 기존 연구들에서 한타박스주의 면역원성을 알아보기 위해 적용한 주요 측정법은 4가지 - immunofluorescent assay (IFA), enzyme-linked immunosorbant assay (ELISA), high density particle agglutination (HDP), plaque reduction neutralizing antibody test (PRNT) -가 있는데, 문제는 동일 시료라 하더라도 측

Received: January 6, 2019 Accepted: August 2, 2019

**Corresponding author:** Jong-Myon Bae, MD, PhD  
Department of Preventive Medicine, Jeju National University School of Medicine, 102 Jejudaehak-ro, Jeju 63243, Korea

E-mail: [jmbae@jejunu.ac.kr](mailto:jmbae@jejunu.ac.kr)

This is an Open Access article distributed under the terms of the Creative Commons Attribution Non-Commercial License (<http://creativecommons.org/licenses/by-nc/4.0/>) which permits unrestricted non-commercial use, distribution, and reproduction in any medium, provided the original work is properly cited.

정법에 따라 항체양전율은 달리 해석된다는 점이다[2].

둘째, 추가접종(boosting)으로 면역원성을 장기간 유지하는 것과, 백신 유효성(vaccine effectiveness, VE)을 확보한다는 것은 다른 개념임을 의결과정에 반영하지 않았다[3]. 더군다나 한타박스주는 이미 약 30년 전에 시판허가가 나서 고위험군을 대상으로 접종이 이루어져 왔기에, 항체양전율이 아니라 시판후 조사연구를 통한 VE로 한타박스 사용에 대한 재검토가 이루어져야 한다. 2018년 12월 현재까지 KoreaMed (<https://koreamed.org>)와 PubMed (<https://www.ncbi.nlm.nih.gov/pubmed/>)에서의 검색을 통해 한타박스의 VE와 관련하여 3편의 논문[4-6]이 선정되었다. 1999년에 발간된 Chu et al. [4]의 연구는 유고슬라비아에서 이루어진 무작위배정 지역시험으로 총 3회의 한타박스 접종군 1900명 중 환자 발생이 전무한 반면, 위약군 2000명에서 20명의 환자 발생이 있었다. 이를 근거한다면 기존의 총 3회 접종만으로도 백신효과가 있다고 추론할 수 있다. 2004년 발간된 Park et al. [5]의 연구는 군복무 중 발생한 57명의 군인 환자를 대상으로 환자-대조군 연구를 수행한 것으로, VE는 통계적 유의성이 없는 것으로 나왔다. 이 결과에 있어, 저자들이 언급한 대로 대상자수의 부족으로 추가 연구가 필요함을 우선 감안해야 하지만, 접종횟수의 논란 이전에 현재 개발된 한타박스의 시판허가에 대한 검토가 우선 필요할 수 있음을 의미한다. 2018년 발간된 Jung et al. [6]의 연구는 2011년 7월부터 2017년 2월까지 발생한 100명의 군인 환자를 대상으로 환자-대조군 연구를 수행한 것이다. 1회 이상 접종할 경우 VE는 78.7 (9.1-95.0)로 유의하게 나왔지만, 2회 이상 접종했을 때의 VE는 통계적 유의성이 없게 나왔다. 따라서 접종횟수를 늘려서 장기간 면역원성을 확보한다는 것과 백신의 예방효과가 있다는 것은 다른 것임을 3개의 VE 연구결과로 도출할 수 있다.

셋째, 4회 접종에 있어 추가접종 후 4개월 시점까지의 임상 결과가 제출된 상황에서, ‘타당성을 인정하면(60개월까지의 장기면역원성을 알아보는) 그러한 계획으로 계속 확인한다’는 언급은 이해하기 어렵다. 찬반겨수로 장기면역원성의 타당성에 대하여 허가조건을 삭제하였기 때문이다. 나아가, 개발된 한타박스에 있어서 잘 설계된 야외 시험(well-designed field trials)이 필요하며[2,7], 중화항체반응(neutralizing humoral immune response)뿐만 아니라 세포 면역(cell immunity)에 대한 연구가 필요하다는[8] 연구자들의 최근 제안들을 전혀 반영하고 있지 않고 있다. 또한 접종횟수를 1회 추가하는 것에 대한 비용-편익(cost-benefit) 검토가 토론과정에 전혀 없었다.

## 한타바이러스 백신개발에 있어서 고전적 백신개발법의 한계

한타박스는 HFRS의 병원체인 한타바이러스(Hantaan virus, HTNV)를 약독화시켜 개발한 백신이다[9]. HFRS를 예방하기

위한 백신들이 여러 가지로 개발 중에 있지만[8], HTNV의 병원체 특성과 HFRS의 임상적 특성으로 효과적이고 안전한 백신 개발을 어렵게 하고 있다.

첫째, HTNV의 병원성(pathogenesis)을 연구할 적절한 동물 모델을 구하기 어렵다는 점이다[9]. HTNV는 병원소로 알려진 동물에게 지속적인 감염상태를 유지하면서도 감염병을 일으키지 않기 때문이다.

둘째, HFRS의 각종 임상증상은 모세혈관 투과성 증가에 기인하는 것으로, 이는 HTNV의 직접적인 세포병리(cytopathology) 작용보다는 감염자의 면역 기전으로 발생하는 것이다[10]. 그런데 질병의 중증도와 백신 여부 간에는 통계적 유의성이 없다는 사실[11]에 바탕할 때, 한타바이러스 백신의 면역학적 영향에 대하여 추가적인 연구가 필요하다.

따라서 HTNV로 인한 HFRS 예방을 위해 동정-비활성화-주입(isolate-inactivate-inject)의 고전적 개발 단계를 거치는 것은 실패할 가능성이 높으며[12], ‘혁신적인’(innovative) 개발법을 도입할 필요가 있다[13].

## 백신 개발에 대한 백신체학의 적용 제안

고전적 개발법으로 두창(small pox)을 퇴치할 수 있었지만, 오늘날 전 세계 주요 감염병인 HIV, HCV, 뎅기열, 말라리아 등에 대한 백신 개발은 부진하다[12,14,15]. 더욱이 신종 감염병에 대한 백신 개발에 대한 신속한 대응도 필요하다[14,15].

21세기에 들어오며 다양한 유전체학(omics)이 정립되면서, 새로운 백신 개발에 있어서도 이와 관련하여 다양한 개념들 - Vaccinomics (백신체학), System vaccinology (체계 백신학), Structure vaccinology (구조 백신학), Vaccine informatics (백신 정보학), Immune response network theory (면역반응 상호연결이론), Reverse vaccinology (역전 백신학) - 을 적용하고 있다[14,16]. 특히 백신체학은 omics 기법을 이용하여 투여할 백신에 대한 ‘면역과정을 이해하고 백신효능을 예측하여’ 백신개발에 활용하는 포괄적 연구로 정의하며[16,17], 같은 목적을 갖지만 체계 생물학(system biology) 방법을 적용함을 강조하는 체계 백신학[18]과 같은 의미로 사용되고 있다[14,16]. 추가로 백신의 안전을 위해 유해사례(adverse events)를 감소시킬 목적의 유해유전체학(Adversomics)도 적용하고 있다[16].

Poland et al. [16]은 백신체학의 궁극적인 목적은 면역반응을 알아내고 미리 예측하는 것이라고 밝히면서, Table 1처럼 5가지의 실제 적용 범위를 제시하였다. 백신개발을 위한 백신체학 수행과정은 Oberg et al. [12], De Gregorio & Rappuoli [19], Mooney et al. [20], Nakaya & Pulendran [21] 등의 논문에서 제시한 흐름도로 설명을 대신한다. 이런 과정을 통해 YF-17D란 황열 백신 개발을 성공하였으며[22,23], HIV [24], 인플루엔자 [25] 등의 감염에 대한 백신뿐만 아니라 각종 암에 대한 백신

**Table 1. Five practical uses of vaccinomics<sup>1</sup>**

| Method      | Practical uses                                                                                                                                                                                                                                          |
|-------------|---------------------------------------------------------------------------------------------------------------------------------------------------------------------------------------------------------------------------------------------------------|
| Vaccinomics | - A tool for evaluation of immune responses<br>- A tool in developing new vaccine candidates<br>- A tool in developing individualized vaccinology approaches<br>- A tool in adversomics<br>- Development of systems level models to support vaccinomics |

<sup>1</sup>Modified from Poland et al. *Semin Immunol* 2013;25:89-103 [16].

[26,27]도 활발히 개발 중에 있다. 이렇게 백신체학 적용을 통해 많은 비용과 시간이 필요한 임상시험의 단점을 극복할 수 있으면서 [16,28], 개인별 맞춤형 백신(personalized vaccine) 제공이 가능하다 [16,29]는 장점도 갖는다.

## 결론

HFRS도 HLA 차이에 따른 임상증상의 차이를 보여서 유전자 감수성이 있다는 보고가 있기에 [10], HTNV에 대한 백신개발도 개별 맞춤형으로 이루어져야만 안전하고 효과적인 백신을 제공할 수 있을 것이다 [16]. 다시 말해서 한타박스주에 대한 4회 접종으로 인한 앞으로 5년간의 장기면역원성을 알아내어야 하겠지만, 백신체학을 적용하여 보다 효과적이고 안전한 HTNV 백신을 개발하는 것이 더 필요할 것이다.

## 참고문헌

1. Ministry of Food and Drug Safety. Online library of drugs and foods [cited 2018 Dec 16]. Available from: [http://drug.mfds.go.kr/html/boardLinkBody.jsp?p\\_menuId=040803&p\\_boardSeq=107&p\\_seq=3201&p\\_sub\\_menuId=04080301](http://drug.mfds.go.kr/html/boardLinkBody.jsp?p_menuId=040803&p_boardSeq=107&p_seq=3201&p_sub_menuId=04080301) (Korean).
2. Oh MD, Lee JK. Milestones in history of adult vaccination in Korea. *Clin Exp Vaccine Res* 2012;1(1):9-17.
3. Halloran ME, Longini IM Jr, Struchiner CJ. Design and interpretation of vaccine field studies. *Epidemiol Rev* 1999;21(1):73-88.
4. Chu YK, Gligic A, Tomanovic S, Bozovic B, Obradovic M, Woo YD, et al. A field efficacy trial of inactivated hantaan virus vaccine (Hantavax (TM)) against hemorrhagic fever with renal syndrome (HFRS) in the endemic areas of Yugoslavia from 1996 to 1998. *J Korean Soc Virol* 1999;29(2):55-64 (Korean).
5. Park K, Kim CS, Moon KT. Protective effectiveness of hantavirus vaccine. *Emerg Infect Dis* 2004;10(12):2218-2220.
6. Jung J, Ko SJ, Oh HS, Moon SM, Song JW, Huh K. Protective effectiveness of inactivated hantavirus vaccine against hemorrhagic fever with renal syndrome. *J Infect Dis* 2018;217(9):1417-1420.

7. Sohn YM, Rho HO, Park MS, Kim JS, Summers PL. Primary humoral immune responses to formalin inactivated hemorrhagic fever with renal syndrome vaccine (Hantavax): consideration of active immunization in South Korea. *Yonsei Med J* 2001;42(3):278-284.
8. Krüger DH, Schönrich G, Klempa B. Human pathogenic hantaviruses and prevention of infection. *Hum Vaccin* 2011;7(6):685-693.
9. Avšič-Županc T, Saksida A, Korva M. Hantavirus infections. *Clin Microbiol Infect* 2019;21S:e6-e16.
10. Maes P, Clement J, Gavrillovskaia I, Van Ranst M. Hantaviruses: immunology, treatment, and prevention. *Viral Immunol* 2004;17(4):481-497.
11. Yi Y, Park H, Jung J. Effectiveness of inactivated hantavirus vaccine on the disease severity of hemorrhagic fever with renal syndrome. *Kidney Res Clin Pract* 2018;37(4):366-372.
12. Oberg AL, Kennedy RB, Li P, Ovsyannikova IG, Poland GA. Systems biology approaches to new vaccine development. *Curr Opin Immunol* 2011;23(3):436-443.
13. Schmaljohn CS. Vaccines for hantaviruses: progress and issues. *Expert Rev Vaccines* 2012;11(5):511-513.
14. Poland GA, Whitaker JA, Poland CM, Ovsyannikova IG, Kennedy RB. Vaccinology in the third millennium: scientific and social challenges. *Curr Opin Virol* 2016;17:116-125.
15. Oh SJ, Choi YK, Shin OS. Systems biology-based platforms to accelerate research of emerging infectious diseases. *Yonsei Med J* 2018;59(2):176-186.
16. Poland GA, Kennedy RB, McKinney BA, Ovsyannikova IG, Lambert ND, Jacobson RM, et al. Vaccinomics, adversomics, and the immune response network theory: individualized vaccinology in the 21st century. *Semin Immunol* 2013;25(2):89-103.
17. Poland GA, Ovsyannikova IG, Jacobson RM, Smith DI. Heterogeneity in vaccine immune response: the role of immunogenetics and the emerging field of vaccinomics. *Clin Pharmacol Ther* 2007;82(6):653-664.
18. Pulendran B, Li S, Nakaya HI. Systems vaccinology. *Immunity* 2010;33(4):516-529.
19. De Gregorio E, Rappuoli R. Vaccines for the future: learning from human immunology. *Microb Biotechnol* 2012;5(2):149-155.
20. Mooney M, McWeeney S, Sékaly RP. Systems immunogenetics of vaccines. *Semin Immunol* 2013;25(2):124-129.
21. Nakaya HI, Pulendran B. Vaccinology in the era of high-throughput biology. *Philos Trans R Soc Lond B Biol Sci* 2015;370(1671):20140146.

22. Querec TD, Akondy RS, Lee EK, Cao W, Nakaya HI, Teuwen D, et al. Systems biology approach predicts immunogenicity of the yellow fever vaccine in humans. *Nat Immunol* 2009;10(1):116-125.
23. Gaucher D, Therrien R, Kettaf N, Angermann BR, Boucher G, Filali-Mouhim A, et al. Yellow fever vaccine induces integrated multilineage and polyfunctional immune responses. *J Exp Med* 2008;205(13):3119-3131.
24. Ackerman ME, Barouch DH, Alter G. Systems serology for evaluation of HIV vaccine trials. *Immunol Rev* 2017;275(1):262-270.
25. Mooney M, McWeeney S, Canderan G, Sékaly RP. A systems framework for vaccine design. *Curr Opin Immunol* 2013;25(5):551-555.
26. Circelli L, Petrizzo A, Tagliamonte M, Tornesello ML, Buonaguro FM, Buonaguro L. Systems biology approach for cancer vaccine development and evaluation. *Vaccines (Basel)* 2015;3(3):544-555.
27. Petrizzo A, Tagliamonte M, Tornesello M, Buonaguro FM, Buonaguro L. Systems vaccinology for cancer vaccine development. *Expert Rev Vaccines* 2014;13(6):711-719.
28. Hagan T, Nakaya HI, Subramaniam S, Pulendran B. Systems vaccinology: enabling rational vaccine design with systems biological approaches. *Vaccine* 2015;33(40):5294-5301.
29. Poland GA, Ovsyannikova IG, Jacobson RM. Personalized vaccines: the emerging field of vaccinomics. *Expert Opin Biol Ther* 2008;8(11):1659-1667.
